# Supplementary material for: The tryptophan-aspartate (WD) repeat domain of bovine Coronin-1A promotes mycobacterial survival by inhibiting calcium signaling-mediated phagosome-lysosome fusion
Source: Springer Nature journal article supplement (doi:10.1186/s13567-025-01471-6), 2025-02-07

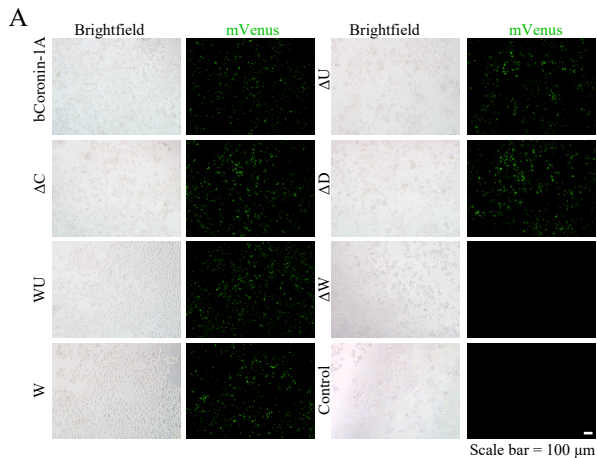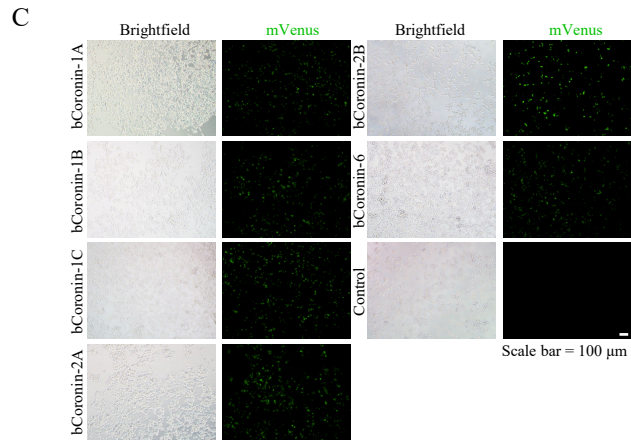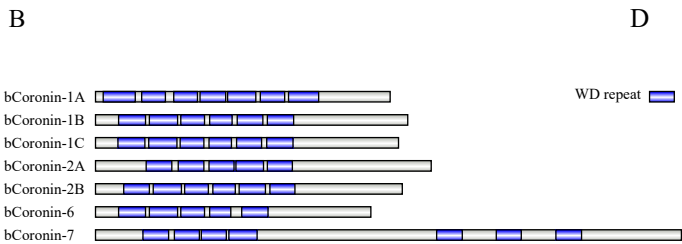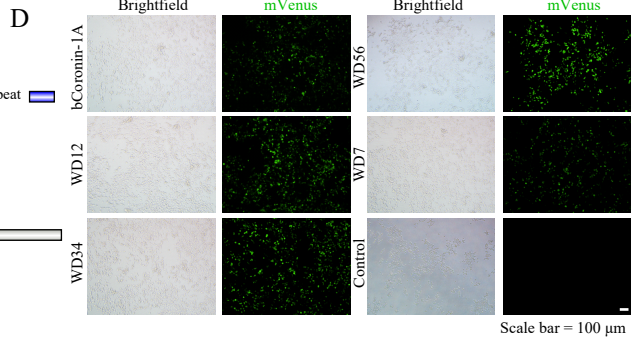

Supplement: MOESM2 [file 13567_2025_1471_MOESM2_ESM.pdf]
